# Supplementary material for: RGDS-Modified Superporous Poly(2-Hydroxyethyl Methacrylate)-Based Scaffolds as 3D In Vitro Leukemia Model
Source: Int J Mol Sci. 2021 Feb 27;22(5):2376. doi: 10.3390/ijms22052376 (PMC7956824; doi:10.3390/ijms22052376)
Supplement: Supplementary file 1 [file ijms-22-02376-s001.pdf]

## Supplementary Materials

Table S1. Characterization of patient's samples.

| Patient No. | Age | Sex    | Leu (×10 <sup>9</sup> /l) | Lym (%) | <i>IGHV</i> mutational status | <i>TP53</i> mutational status                                    | Cytogenetic aberrations and other prognostically relevant molecular changes | Years after CLL diagnosis | Treatment                                                                   |
|-------------|-----|--------|---------------------------|---------|-------------------------------|------------------------------------------------------------------|-----------------------------------------------------------------------------|---------------------------|-----------------------------------------------------------------------------|
| 1           | 83  | Female | 93.7                      | 92.8    | Unmutated                     | Wild type                                                        | -X;<br>+12                                                                  | 9                         | 1. BR<br>2. Rituximab, chlorambucil                                         |
| 2           | 75  | Male   | 162.0                     | 87.4    | Unmutated                     | Wild type                                                        | ZAP70 positive;<br>RB1 deletion                                             | 10                        | 1. Reduced BR                                                               |
| 3           | 62  | Male   | 61.6                      | 90.5    | Unmutated                     | Mutated cumulatively in 57.25 % cells                            | del13q;<br>del11q                                                           | 7                         | 1. Reduced FCR<br>2. Lumbar spine radiotherapy<br>3. BR<br>4. Acalabrutinib |
| 4           | 66  | Female | 123.0                     | 93.4    | Unmutated                     | Deletion in 22 % cells;<br>mutated cumulatively in 34.83 % cells | 8q24/MYC rearrangement                                                      | 4                         | 1. Alemtuzumab<br>2. Ibrutinib                                              |
| 5           | 58  | Male   | 77.4                      | 86.7    | Unmutated                     | Wild type                                                        | del13q14                                                                    | 2                         | None                                                                        |
| 6           | 65  | Female | 59.0                      | 85.8    | Mutated                       | Wild type                                                        | Biclonal CLL                                                                | 8                         | None                                                                        |
| 7           | 83  | Female | 108.0                     | 92.2    | Unmutated                     | Mutated cumulatively in 91 % cells                               | 13q14 biallelic deletion                                                    | 9                         | 1. Alemtuzumab<br>2. Prednisonum                                            |

Leu – leukocytes; Lym – lymphocytes; *IGHV* – immunoglobulin heavy variable gene; *TP53* – tumor protein 53 gene; CLL – chronic lymphocytic leukemia; ZAP70 – zeta chain of T cell receptor associated protein kinase 70; RB1 – retinoblastoma protein 1; MYC – myelocytomatosis oncogene; BR – bendamustine, rituximab; FCR – fludarabine, cyclophosphamide, rituximab.

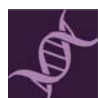

Table S2. Statistical evaluation of the effect of modification with RGDS peptide and plate shaking on cellular metabolic activity.

| Cells          | Probability ( <i>p</i> ) |          |
|----------------|--------------------------|----------|
|                | RGDS                     | Shaking  |
| HS-5           | 0.451270                 | 0.000014 |
| M2-10B4        | 0.322289                 | 0.009031 |
| MEC-1          | 0.248244                 | 0.083556 |
| HG-3           | 0.743284                 | 0.197314 |
| Primary B-CLLs | 0.000003                 | 0.890298 |

Significant values are in red. B-CLLs – chronic lymphocytic leukemia cells.

Table S3. Statistical evaluation of co-culture with M210B4 supported with medium flow on primary CLL cells (B-CLLs) survival.

| Effect             | Probability ( <i>p</i> ) |
|--------------------|--------------------------|
| M2-10B4 co-culture | 0.13695                  |
| Shaking            | 0.50816                  |

Table S4. Statistical evaluation of the effect of the interleukin 4 (IL-4) and CD40 ligand (CD-40L) added into shaken and unshaken medium on primary B-CLLs metabolic activity.

| Effect  | Probability ( <i>p</i> ) |
|---------|--------------------------|
| CD40L   | 0.8099767                |
| IL-4    | 0.3813562                |
| Shaking | 0.0522501                |

Table S5. Characterization of cell line sources.

| Cell line | Source                                                                                                                                                             | Reference |
|-----------|--------------------------------------------------------------------------------------------------------------------------------------------------------------------|-----------|
| MEC-1     | Established from the peripheral blood of a 61-year-old Caucasian man with chronic lymphocytic leukemia (CLL) transformed to B-cell prolymphocytic leukemia (B-PLL) | [1]       |
| HG-3      | Established from leukemic B cells of a 70-year-old Caucasian man with CLL at the time of diagnosis staged as Rai II                                                | [2]       |
| HS-5      | Established from a 30-year-old Caucasian healthy man                                                                                                               | [3]       |
| M2-10B4   | Derived from bone marrow stromal cells from a (C57BL/6J X C3H/HeJ)F1 mouse                                                                                         | [4]       |

---

## References

1. Stacchini, A.; Aragno, M.; Vallario, A.; Alfarano, A.; Circosta, P.; Gottardi, D.; Faldella, A.; Rege-Cambrin, G.; Thunberg, U.; Nilsson, K.; et al. MEC1 and MEC2: Two New Cell Lines Derived from B-Chronic Lymphocytic Leukaemia in Polymorphocytoid Transformation. *Leuk. Res.* **1999**, *23*, 127–136, doi:10.1016/s0145-2126(98)00154-4.
2. Rosén, A.; Bergh, A.-C.; Gogok, P.; Evaldsson, C.; Myhrinder, A.L.; Hellqvist, E.; Rasul, A.; Björkholm, M.; Jansson, M.; Mansouri, L.; et al. Lymphoblastoid Cell Line with B1 Cell Characteristics Established from a Chronic Lymphocytic Leukemia Clone by in Vitro EBV Infection. *Oncoimmunology* **2012**, *1*, 18–27, doi:10.4161/onci.1.1.18400.
3. Roecklein, B.A.; Torok-Storb, B. Functionally Distinct Human Marrow Stromal Cell Lines Immortalized by Transduction with the Human Papilloma Virus E6/E7 Genes. *Blood* **1995**, *85*, 997–1005.
4. Lemoine, F.M.; Humphries, R.K.; Abraham, S.D.; Krystal, G.; Eaves, C.J. Partial Characterization of a Novel Stromal Cell-Derived Pre-B-Cell Growth Factor Active on Normal and Immortalized Pre-B Cells. *Exp. Hematol.* **1988**, *16*, 718–726.
